# Supplementary material for: Regulation of magnetic relaxation behavior by replacing 3d transition metal ions in [M2Dy2] complexes containing two different organic chelating ligands
Source: Royal Society of Chemistry journal article supplement (doi:10.1039/c9dt00774a), 2019-01-01
Supplement: c9dt00774a1.pdf [file c9dt00774a1.pdf]

Electronic Supplementary Information (ESI) for  
*Dalton Transactions*

**Regulation of magnetic relaxation behavior by replacing of 3d transition metal ions for the  $[M_2Dy_2]$  complexes containing two kinds of organic chelating ligands**

Hui-Sheng Wang,<sup>\*a</sup> Cheng-Ling Yin,<sup>a</sup> Zhao-Bo Hu,<sup>b</sup> Yong Chen,<sup>a</sup> Zhi-Quan Pan,<sup>a</sup> You Song,<sup>\*b</sup> Yi-Quan Zhang,<sup>\*c</sup> and Zai-Chao Zhang<sup>d</sup>

<sup>a</sup> School of Chemistry and Environmental Engineering, Key Laboratory of Green Chemical Process of Ministry of Education, Wuhan Institute of Technology, Wuhan 430074, P. R. China.

<sup>b</sup> State Key Laboratory of Coordination Chemistry, School of Chemistry and Chemical Engineering, Collaborative Innovation Center of Advanced Microstructures, Nanjing University, Nanjing 210046, P. R. China.

<sup>c</sup> Jiangsu Key Laboratory for NSLSCS, School of Physical Science and Technology, Nanjing Normal University, Nanjing 210023, China.

<sup>d</sup> Jiangsu Key Laboratory for the Chemistry of Low-dimensional Materials, School of Chemistry and Chemical Engineering, Huaiyin Normal University, P. R. China.

Corresponding author, E-mail: wangch198201@163.com, Fax: +86-27-87194560 (H.-S Wang); yousong@nju.edu.cn (Y. Song) and E-mail: zhangyiquan@njnu.edu.cn (Y.-Q. Zhang)

## Contents

- Table S1.** Crystal data and structure refinement parameters for **1**, **1'**, **2** and **2'**.
- Table S2.** Selected bond lengths (Å) and angles (°) for complexes **1** and **1'**.
- Table S3.** Selected bond lengths (Å) and angles (°) for complexes **2** and **2'**.
- Table S4.** Bond Valence Sum calculations for determining of the oxidation of the Fe and Co atoms in **1** and **2**.
- Table S5.** Bond Valence Sum calculations for determining of the protonation levels of the O atoms from the ligands in **1** and **2**.
- Table S6.** The possible geometries of oct-coordination metal centers and Deviation parameters from each ideal polyhedron for complex **1**.
- Table S7.** The possible geometries of nona-coordination metal centers and Deviation parameters from each ideal polyhedron for complex **2**.
- Table S8.**  $E_a$  and  $\tau_0$  values obtained by fitting the data of  $\ln(\chi''/\chi')$  versus  $1/T$  at different frequencies for **1**.
- Table S9.** Satisfied parameters obtained for the extended Debye model with ac susceptibility data from SQUID magnetometer of compound **2** in the zero applied field.
- Table S10.** Satisfied parameters obtained for the extended Debye model with ac susceptibility data from SQUID magnetometer of compound **2** in the 2000 Oe applied field.
- Table S11.** Calculated energy levels ( $\text{cm}^{-1}$ ),  $\mathbf{g}$  ( $g_x, g_y, g_z$ ) tensors and predominant  $m_J$  values of the lowest eight Kramers doublets (KDs) of **1\_Dy** and **2\_Dy**.
- Table S12.** Wave functions with definite projection of the total moment  $|m_J\rangle$  for the lowest two KDs of individual  $\text{Dy}^{\text{III}}$  fragments for **1\_Dy** and **2\_Dy**.
- Table S13.** Exchange energies  $E$  ( $\text{cm}^{-1}$ ), the energy difference between each exchange doublets  $\Delta_i$  ( $\text{cm}^{-1}$ ) and the main values of the  $g_z$  for the lowest eight and two exchange doublets of **1** and **2**.
- Figure S1.** PXRD patterns and simulated patterns generated from single crystal diffraction data for compounds **1** (left) and **1'** (right).
- Figure S2.** PXRD patterns and simulated patterns generated from single crystal diffraction data for compound **2**.
- Figure S3.** Plots of TGA for complexes **1** and **2**.
- Figure S4.** The plots show the shortest distances of  $\text{Fe}^{\text{III}}\cdots\text{Dy}^{\text{III}}$  (left),  $\text{Dy}^{\text{III}}\cdots\text{Dy}^{\text{III}}$  and  $\text{Fe}^{\text{III}}\cdots\text{Fe}^{\text{III}}$  (right) between the nearest neighbor molecules of **1**.
- Figure S5.** The plots show the shortest distances of  $\text{Dy}^{\text{III}}\cdots\text{Dy}^{\text{III}}$  between the nearest neighbor molecules of **2**.
- Figure S6.** Plots of  $\chi_M^{-1}$  vs  $T$  for complexes **1'** and **2'**.
- Figure S7.**  $M$  vs  $H$  plots for complexes **1'** ( $[\text{Fe}_2\text{Gd}_2]$ , left) and **2'** ( $[\text{Co}_2\text{Gd}_2]$ , right).
- Figure S8.** (Left) Plots of out-of-phase ( $\chi_M''$ ) versus  $f$  (left) for **1**.
- Figure S9.** Plots of in-phase ( $\chi_M'$ ) versus  $T$  (left) and out-of-phase ( $\chi_M''$ ) versus  $T$  (right) for complex **1**.
- Figure S10.** Plots of in-phase ( $\chi_M'$ ) versus  $f$  (left) and out-of-phase ( $\chi_M''$ ) versus  $f$  (right) for **1**.
- Figure S11.** Plots of  $\ln(\chi''/\chi')$  versus  $1/T$  at different frequencies for complex **1**.
- Figure S12.** Plots of in-phase ( $\chi_M'$ ) versus  $T$  (left) and out-of-phase ( $\chi_M''$ ) versus  $T$  (right) for complex **2** at 0 Oe dc field.
- Figure S13.** Cole-Cole plots for complex **2** under 0 Oe dc field (left) and Arrhenius plots of  $\ln(\tau)$  vs  $T^{-1}$  under 0 Oe for complex **2** (right).

- Figure S14.** Plots of out-of-phase ( $\chi_M''$ ) versus  $f$  for complex **2** at 1.8 K under the dc fields.
- Figure S15.** Plots of in-phase ( $\chi_M'$ , left) and out-of-phase ( $\chi_M''$ , right) versus  $T$  for complex **2**.
- Figure S16.** Plots of in-phase ( $\chi_M'$ , left) and out-of-phase ( $\chi_M''$ , right) versus  $f$  for complex **2**.
- Figure S17.** The plots showing the distances of Dy<sup>III</sup>...Dy<sup>III</sup> and angles of Dy1O1Dy1a.
- Figure S18.** Calculated model structures of **1\_Dy**, **1\_Fe** and **2\_Dy**; H atoms are omitted.
- Figure S19.** Magnetization blocking barriers for individual Dy<sup>III</sup> fragments of **1\_Dy** and **2\_Dy**.
- Figure S20.** Two types of  $J_1$  and  $J_2$  in **1** and one type of  $J_1$  in **2**.
- Figure S21.** Calculated (red solid line) and experimental (black dot) data of magnetic susceptibilities of **1** and **2**.
- Figure S22.** Calculated orientations of the local main magnetic axes in the ground KDs on Dy<sup>III</sup> ions of complexes **1** and **2**.
- Figure S23.** Ground-state magnetic anisotropy of **1** (left) and **2** (right) calculated by Magellan Software.

**Table S1.** Crystal data and structure refinement parameters for **1**, **1'**, **2** and **2'**.

| Compounds                                              | <b>1</b>                                                                                                        | <b>1'</b>                                                                                                       | <b>2</b>                                                                                           | <b>2'</b>                                                                                           |
|--------------------------------------------------------|-----------------------------------------------------------------------------------------------------------------|-----------------------------------------------------------------------------------------------------------------|----------------------------------------------------------------------------------------------------|-----------------------------------------------------------------------------------------------------|
| Formula [ <sup>*</sup> ]                               | C <sub>60</sub> H <sub>84</sub> Cl <sub>2</sub> Dy <sub>2</sub> Fe <sub>2</sub> N <sub>14</sub> O <sub>20</sub> | C <sub>60</sub> H <sub>84</sub> Cl <sub>2</sub> Fe <sub>2</sub> Gd <sub>2</sub> N <sub>14</sub> O <sub>20</sub> | C <sub>65</sub> H <sub>99</sub> Co <sub>2</sub> Dy <sub>2</sub> N <sub>10</sub> O <sub>31.50</sub> | C <sub>66</sub> H <sub>101</sub> Co <sub>2</sub> Gd <sub>2</sub> N <sub>10</sub> O <sub>31.50</sub> |
| Formula weight [ <sup>*</sup> ]                        | 1829.01                                                                                                         | 1818.51                                                                                                         | 1967.40                                                                                            | 1970.92                                                                                             |
| Temperature                                            | 173(2)                                                                                                          | 173(2)                                                                                                          | 173(2)                                                                                             | 173(2)                                                                                              |
| Wavelength (Å)                                         | 0.71073                                                                                                         | 0.71073                                                                                                         | 0.71073                                                                                            | 0.71073                                                                                             |
| Crystal system                                         | Monoclinic                                                                                                      | Monoclinic                                                                                                      | Triclinic                                                                                          | Triclinic                                                                                           |
| Space group                                            | <i>P</i> 2 <sub>1</sub> / <i>n</i>                                                                              | <i>P</i> 2 <sub>1</sub> / <i>n</i>                                                                              | <i>P</i> $\bar{1}$                                                                                 | <i>P</i> $\bar{1}$                                                                                  |
| <i>a</i> (Å)                                           | 11.4988(7)                                                                                                      | 11.5322(5)                                                                                                      | 9.8087(4)                                                                                          | 9.8667(6)                                                                                           |
| <i>b</i> [Å]                                           | 9.7823(6)                                                                                                       | 9.6271(4)                                                                                                       | 13.3481(6)                                                                                         | 13.3781(8)                                                                                          |
| <i>c</i> [Å]                                           | 30.8793(19)                                                                                                     | 32.6696(12)                                                                                                     | 14.8569(7)                                                                                         | 14.8804(8)                                                                                          |
| $\alpha$ [°]                                           | 90                                                                                                              | 90                                                                                                              | 85.486(2)                                                                                          | 85.483(2)                                                                                           |
| $\beta$ [°]                                            | 94.418(2)                                                                                                       | 94.5820(10)                                                                                                     | 87.309(2)                                                                                          | 87.541(2)                                                                                           |
| $\gamma$ [°]                                           | 90                                                                                                              | 90                                                                                                              | 82.961(2)                                                                                          | 82.719(2)                                                                                           |
| <i>V</i> [Å <sup>3</sup> ]                             | 3463.1(4)                                                                                                       | 3615.4(3)                                                                                                       | 1923.16(15)                                                                                        | 1941.2(2)                                                                                           |
| <i>Z</i>                                               | 2                                                                                                               | 2                                                                                                               | 1                                                                                                  | 1                                                                                                   |
| <i>D</i> <sub>c</sub> [g/cm <sup>3</sup> ]             | 1.754                                                                                                           | 1.670                                                                                                           | 1.699                                                                                              | 1.686                                                                                               |
| $\mu$ (Mo K $\alpha$ ) [mm <sup>-1</sup> ]             | 2.703                                                                                                           | 2.357                                                                                                           | 2.436                                                                                              | 2.198                                                                                               |
| <i>F</i> (000)                                         | 1840                                                                                                            | 1832                                                                                                            | 997                                                                                                | 1001                                                                                                |
| Crystal size (mm)                                      | 0.22 × 0.12 × 0.08                                                                                              | 0.24 × 0.18 × 0.07                                                                                              | 0.18 × 0.11 × 0.07                                                                                 | 0.36 × 0.22 × 0.17                                                                                  |
| $\theta$ range (°)                                     | 2.8768~25.1586                                                                                                  | 2.9713~25.3156                                                                                                  | 3.0547~26.1746                                                                                     | 3.0441~25.3101                                                                                      |
|                                                        | -13 ≤ <i>h</i> ≤ 13                                                                                             | -13 ≤ <i>h</i> ≤ 13                                                                                             | -10 ≤ <i>h</i> ≤ 11                                                                                | -10 ≤ <i>h</i> ≤ 11                                                                                 |
| Index ranges                                           | -11 ≤ <i>k</i> ≤ 11                                                                                             | -11 ≤ <i>k</i> ≤ 10                                                                                             | -15 ≤ <i>k</i> ≤ 15                                                                                | -15 ≤ <i>k</i> ≤ 15                                                                                 |
|                                                        | -36 ≤ <i>l</i> ≤ 36                                                                                             | -38 ≤ <i>l</i> ≤ 38                                                                                             | -17 ≤ <i>l</i> ≤ 17                                                                                | -17 ≤ <i>l</i> ≤ 17                                                                                 |
| Reflections collected                                  | 34607                                                                                                           | 23872                                                                                                           | 28458                                                                                              | 14692                                                                                               |
| Unique reflections [ <i>R</i> <sub>int</sub> ]         | 6074 [0.0651]                                                                                                   | 6306 [0.0554]                                                                                                   | 6755 [0.0760]                                                                                      | 6783 [0.0749]                                                                                       |
| Reflections with <i>I</i> > 2 $\sigma$ ( <i>I</i> )    | 4799                                                                                                            | 5102                                                                                                            | 5294                                                                                               | 5337                                                                                                |
| Goodness-of-fit on <i>F</i> <sup>2</sup>               | 1.176                                                                                                           | 1.083                                                                                                           | 1.032                                                                                              | 1.088                                                                                               |
| Final <i>R</i> indices                                 | <i>R</i> <sub>1</sub> <sup>a</sup> =0.0912, <i>wR</i> <sub>2</sub> <sup>b</sup> =                               | <i>R</i> <sub>1</sub> <sup>a</sup> =0.0569, <i>wR</i> <sub>2</sub> <sup>b</sup> =                               | <i>R</i> <sub>1</sub> <sup>a</sup> = 0.0382, <i>wR</i> <sub>2</sub> <sup>b</sup>                   | <i>R</i> <sub>1</sub> <sup>a</sup> = 0.0420, <i>wR</i> <sub>2</sub> <sup>b</sup>                    |
| [ <i>I</i> >2 $\sigma$ ( <i>I</i> )]                   | 0.1855                                                                                                          | 0.1033                                                                                                          | =0.0564                                                                                            | =0.0650                                                                                             |
| <i>R</i> indices (all data)                            | <i>R</i> <sub>1</sub> = 0.1170, <i>wR</i> <sub>2</sub> =                                                        | <i>R</i> <sub>1</sub> = 0.0800, <i>wR</i> <sub>2</sub> =                                                        | <i>R</i> <sub>1</sub> = 0.0636, <i>wR</i> <sub>2</sub> =                                           | <i>R</i> <sub>1</sub> = 0.0658, <i>wR</i> <sub>2</sub> =                                            |
|                                                        | 0.1927                                                                                                          | 0.1087                                                                                                          | 0.0598                                                                                             | 0.0688                                                                                              |
| <i>S</i> (all data)                                    | 1.182                                                                                                           | 1.084                                                                                                           | 1.033                                                                                              | 1.089                                                                                               |
| ( $\Delta\rho$ ) <sub>max,min</sub> /e Å <sup>-3</sup> | 6.037 and -5.801                                                                                                | 1.011 and -1.387                                                                                                | 0.823 and -0.609                                                                                   | 1.750 and -0.988                                                                                    |

\* the formula and formula weight include the solvent molecules in the crystal lattices, which were subtracted by the SQUEEZE program. <sup>a</sup>*R*<sub>1</sub> =  $\Sigma(|F_o| - |F_c|)/\Sigma|F_o|$ . <sup>b</sup> *wR*<sub>2</sub> =  $[\Sigma[w(F_o^2 - F_c^2)^2]/\Sigma[w(F_o^2)^2]]^{1/2}$ ,  $w = 1/[\sigma^2(F_o^2)(ap)^2 + bp]$ , where  $p = [\max(F_o^2, 0) + 2F_c^2]/3$ .

**Table S2.** Selected bond lengths (Å) and angles (°) for complexes **1** and **1'**.

| Selected bond lengths for <b>1</b>  |            |                         |            |           |           |
|-------------------------------------|------------|-------------------------|------------|-----------|-----------|
| Cl1-Dy1                             | 2.691(3)   | Dy1-O6                  | 2.467(10)  | Fe1-O2    | 2.025(9)  |
| Dy1-O7                              | 2.239(9)   | Dy1-N4                  | 2.558(11)  | Fe1-N3    | 2.099(12) |
| Dy1-O5                              | 2.302(9)   | Fe1-O5                  | 1.924(9)   | Fe1-N1    | 2.128(12) |
| Dy1-O2                              | 2.379(9)   | Fe1-O1                  | 1.934(9)   | Fe1-N2    | 2.220(11) |
| Selected bond lengths for <b>1'</b> |            |                         |            |           |           |
| Cl1-Gd1                             | 2.7382(18) | Gd1-O6                  | 2.483(5)   | Fe1-O2    | 2.036(5)  |
| Gd1-O7                              | 2.271(5)   | Gd1-N4                  | 2.583(6)   | Fe1-N3    | 2.106(7)  |
| Gd1-O5                              | 2.333(5)   | Fe1-O1                  | 1.929(5)   | Fe1-N1    | 2.132(6)  |
| Gd1-O2                              | 2.425(5)   | Fe1-O5                  | 1.951(5)   | Fe1-N2    | 2.227(7)  |
| Selected bond angles for <b>1</b>   |            |                         |            |           |           |
| O7-Dy1-O7                           | 71.2(3)    | O6-Dy1-Cl1              | 90.4(2)    | O2-Fe2-N3 | 83.9(4)   |
| O7-Dy1-O5                           | 101.4(3)   | N4-Dy1-Cl1              | 83.1(2)    | O5-Fe2-N1 | 100.7(4)  |
| O7-Dy1-O5 <sup>i</sup>              | 83.1(3)    | O6-Dy1-N4               | 66.2(3)    | O2-Fe2-N2 | 109.8(3)  |
| O7-Dy1-O2                           | 82.0(3)    | O7-Dy1-O6               | 153.5(3)   | N3-Fe2-N2 | 77.7(4)   |
| O7-Dy1-O2 <sup>i</sup>              | 133.2(3)   | O7-Dy1-O6 <sup>i</sup>  | 135.1(3)   | O5-Fe2-O1 | 100.1(4)  |
| O5-Dy1-O2                           | 65.0(3)    | O5-Dy1-O6               | 82.7(3)    | O5-Fe2-O2 | 78.9(3)   |
| O7-Dy1-Cl1                          | 96.4(2)    | O2-Dy1-N4               | 123.9(3)   | O1-Fe2-O2 | 87.6(3)   |
| O7-Dy1-Cl1 <sup>i</sup>             | 83.5(2)    | O1-Fe2-N3               | 99.5(4)    | O5-Fe2-N3 | 153.2(4)  |
| Selected bond angles for <b>1'</b>  |            |                         |            |           |           |
| O7-Gd1-O7 <sup>ii</sup>             | 70.2(2)    | O2-Gd1-O6               | 81.50(17)  | O5-Fe1-N3 | 152.7(2)  |
| O7-Gd1-O5                           | 103.75(18) | O7-Gd1-N4               | 138.48(18) | O2-Fe1-N3 | 82.9(2)   |
| O7-Gd1-O5 <sup>ii</sup>             | 83.32(17)  | O7-Gd1-N4 <sup>ii</sup> | 68.37(18)  | O1-Fe1-N1 | 86.1(2)   |
| O7-Gd1-O2                           | 80.99(16)  | O6-Gd1-Cl1              | 88.69(13)  | O5-Fe1-N1 | 101.9(2)  |
| O7-Gd1-O2 <sup>ii</sup>             | 130.65(16) | N4-Gd1-Cl1              | 83.81(15)  | O2-Fe1-N1 | 172.1(2)  |
| O5-Gd1-O2                           | 65.38(16)  | O6-Gd1-N4               | 65.61(18)  | N3-Fe1-N1 | 97.7(3)   |
| O7-Gd1-O6                           | 155.91(18) | O7-Gd1-O4               | 90.65(17)  | O1-Fe1-N2 | 162.6(2)  |
| O5-Gd1-O6                           | 83.67(17)  | O1-Fe1-N3               | 101.5(3)   | O5-Fe1-N2 | 89.6(2)   |

Symmetry code: <sup>i</sup> 1-x, 1-y, -z; <sup>ii</sup> -x, 2-y, 1-z.

**Table S3.** Selected bond lengths (Å) and angles (°) for complexes **2** and **2'**.

| Selected bond lengths for <b>2</b>  |           |                          |            |                          |            |
|-------------------------------------|-----------|--------------------------|------------|--------------------------|------------|
| Co1-N3                              | 1.891(6)  | Co1-Dy1                  | 3.4899(9)  | Dy1-O8                   | 2.427(4)   |
| Co1-O5                              | 1.895(4)  | Dy1-O6                   | 2.258(4)   | Dy1-O1                   | 2.479(4)   |
| Co1-N1                              | 1.903(6)  | Dy1-O6                   | 2.343(4)   | Dy1-N4                   | 2.489(5)   |
| Co1-O1                              | 1.951(4)  | Dy1-O7                   | 2.362(4)   | Dy1-O9                   | 2.501(4)   |
| Co1-N2                              | 1.963(6)  | Dy1-O5                   | 2.384(4)   | Dy1-O3                   | 2.717(4)   |
| Selected bond lengths for <b>2'</b> |           |                          |            |                          |            |
| Co1-N1                              | 1.892(6)  | Gd1-O6                   | 2.365(4)   | Co1-N2                   | 1.965(6)   |
| Co1-O1                              | 1.896(4)  | Gd1-O7                   | 2.394(4)   | Co1-Gd1                  | 3.5125(9)  |
| Co1-O5                              | 1.899(4)  | Gd1-O5                   | 2.424(4)   | Gd1-O6                   | 2.305(4)   |
| Co1-N3                              | 1.910(5)  | Gd1-O8                   | 2.460(4)   | Gd1-N4                   | 2.527(5)   |
| Co1-O2                              | 1.954(4)  | Gd1-O2                   | 2.496(4)   | Gd1-O9                   | 2.528(4)   |
| Selected bond angles for <b>2</b>   |           |                          |            |                          |            |
| O2-Co1-N3                           | 92.4(2)   | O6-Dy1-O5 <sup>iii</sup> | 143.82(14) | O6-Dy1-N4                | 64.50(15)  |
| O2-Co1-O5                           | 89.84(19) | O6-Dy1-O5                | 117.10(14) | O7-Dy1-N4                | 87.20(16)  |
| O2-Co1-N1                           | 97.7(2)   | O7-Dy1-O5                | 134.26(14) | O1-Dy1-O9                | 75.59(14)  |
| O2-Co1-O1                           | 86.10(19) | O6-Dy1-O8 <sup>iii</sup> | 73.70(15)  | N4-Dy1-O9                | 80.12(16)  |
| O1-Co1-N2                           | 97.5(2)   | O6-Dy1-O8                | 77.51(14)  | O6-Dy1-O3 <sup>iii</sup> | 67.50(13)  |
| O6-Dy1-O6                           | 73.94(15) | O5-Dy1-O1                | 63.77(14)  | O6-Dy1-O3                | 128.35(13) |
| O6-Dy1-O7 <sup>iii</sup>            | 81.49(14) | O8-Dy1-O1                | 77.10(14)  | O1-Dy1-O3                | 60.66(13)  |
| O6-Dy1-O7                           | 71.96(14) | O6-Dy1-N4 <sup>iii</sup> | 138.41(15) | N4-Dy1-O3                | 143.33(15) |
| Selected bond angles for <b>2'</b>  |           |                          |            |                          |            |
| N1-Co1-O1                           | 92.2(2)   | O6-Gd1-O5                | 143.90(13) | O6 Gd1 N4                | 138.24(12) |
| N1-Co1-O5                           | 95.8(2)   | O6-Gd1-O5 <sup>iv</sup>  | 115.89(14) | O6 Gd1 N4 <sup>iv</sup>  | 63.77(11)  |
| O1-Co1-O5                           | 90.25(18) | O6-Gd1-O8                | 77.97(14)  | O7 Gd1 N4                | 87.55(11)  |
| N1-Co1-N3                           | 91.6(2)   | O7-Gd1-O8                | 144.69(15) | O5 Gd1 N4                | 62.21(11)  |
| O1-Co1-N3                           | 97.3(2)   | O5-Gd1-O8                | 75.64(14)  | O8 Gd1 N4                | 95.45(11)  |
| O5-Co1-N3                           | 169.1(2)  | O6-Gd1-O2                | 91.52(13)  | O2 Gd1 N4                | 125.28(12) |
| N1-Co1-O2                           | 178.3(2)  | O6-Gd1-O2                | 153.45(13) | O9 Gd1 N4                | 80.05(11)  |
| O1-Co1-O2                           | 86.08(18) | O2 Gd1 O9                | 75.64(10)  | O6 Gd1 O4                | 67.83(10)  |

Symmetry code: <sup>iii</sup> -x, 1-y, 1-z; <sup>iv</sup> -x, -y, 2-z.**Table S4.** Bond Valence Sum calculations for determining of the oxidation of the Fe and Co atoms in **1** and **2**.<sup>a</sup>

| Fe atom in complex <b>1</b> | Fe(II) | Fe(III)     |
|-----------------------------|--------|-------------|
| Fe(1)                       | 2.5    | <u>2.99</u> |
| Co atom in complex <b>2</b> | Co(II) | Co(III)     |
| Co(1)                       | 4.0    | <u>3.5</u>  |

<sup>a</sup>The underlined value is the closest to the charge for which it was calculated. The oxidation state is the nearest whole number to the underlined value.

**Table S5.** Bond Valence Sum calculations for determining of the protonation levels of the O atoms from the ligands in **1** and **2**.

| Atoms in <b>1</b> | BVS values of <b>1</b> | Atoms in <b>2</b> | BVS values of in <b>2</b> |
|-------------------|------------------------|-------------------|---------------------------|
| O1                | 1.80                   | O1                | 1.97                      |
| O2                | 1.99                   | O2                | 1.82                      |
| O4                | 2.01                   | O3                | 2.08                      |
| O5                | 2.04                   | O5                | 2.02                      |
| O6                | 1.19                   | O6                | 1.95                      |
| O7                | 1.93                   | O7                | 1.88                      |
|                   |                        | O8                | 1.8                       |
|                   |                        | O9                | 1.12                      |

The values of BVS calculations for O atoms in the ~1.8–2.0, ~1.0–1.2, and ~0.2–0.4 ranges are indicative of non-, single- and double-protonation, respectively

**Table S6.** The possible geometries of oct-coordination metal centers and Deviation parameters from each ideal polyhedron for Dy of complex **1**.

| Point group | Geometry | Polyhedron                                     | Dy1    |
|-------------|----------|------------------------------------------------|--------|
| $D_{8h}$    | OP-8     | Octagon                                        | 32.171 |
| $C_{7v}$    | HPY-8    | Heptagonal pyramid                             | 24.643 |
| $D_{6h}$    | HBPY-8   | Hexagonal bipyramid                            | 13.547 |
| $O_h$       | CU-8     | Cube                                           | 12.342 |
| $D_{4d}$    | SAPR-8   | Square antiprism                               | 3.89   |
| $D_{2d}$    | TDD-8    | Triangular dodecahedron                        | 2.078  |
| $D_{2d}$    | JGBF-8   | Johnson - Gyrobifastigium (J26)                | 10.348 |
| $D_{3h}$    | JETBPY-8 | Johnson - Elongated triangular bipyramid (J14) | 27.737 |
| $C_{2v}$    | JBTP-8   | Johnson - Biaugmented trigonal prism (J50)     | 3.469  |
| $C_{2v}$    | BTPR-8   | Biaugmented trigonal prism                     | 3.303  |
| $D_{2d}$    | JSD-8    | Snub disphenoid (J84)                          | 3.426  |
| $T_d$       | TT-8     | Triakis tetrahedron                            | 13.124 |
| $D_{3h}$    | ETBPY-8  | Elongated trigonal bipyramid                   | 24.312 |

**Table S7.** The possible geometries of nona-coordination metal centers and Deviation parameters from each ideal polyhedron for Dy of complex **2**.

| Point group | Geometry | Polyhedron                                              | Dy1    |
|-------------|----------|---------------------------------------------------------|--------|
| $D_{9h}$    | EP-9     | Enneagon                                                | 32.969 |
| $C_{8v}$    | OPY-9    | Octagonal pyramid                                       | 22.277 |
| $D_{7h}$    | HBPY-9   | Heptagonal bipyramid                                    | 16.59  |
| $C_{3v}$    | JTC-9    | Triangular cupola (J3) = trivacant cuboctahedron        | 15.29  |
| $C_{4v}$    | JCCU-9   | Capped cube (Elongated square pyramid, J8)              | 9.588  |
| $C_{4v}$    | 6CCU-9   | Capped cube                                             | 7.996  |
| $C_{4v}$    | JCSAPR-9 | Capped sq. antiprism (Gyroelongated square pyramid J10) | 1.953  |
| $C_{4v}$    | CSAPR-9  | Capped square antiprism                                 | 1.565  |
| $D_{3h}$    | JTCTPR-9 | Tricapped trigonal prism (J51)                          | 2.667  |
| $D_{3h}$    | TCTPR-9  | Tricapped trigonal prism                                | 2.093  |
| $C_{3v}$    | JTDIC-9  | Tridiminished icosahedron (J63)                         | 13.086 |
| $C_{2v}$    | HH-9     | Hula-hoop                                               | 8.122  |
| $C_s$       | MFF-9    | Muffin C                                                | 1.454  |

**Table S8.**  $E_a$  and  $\tau_0$  values obtained by fitting the data of  $\ln(\chi''/\chi')$  versus  $1/T$  at different frequencies for **1**.<sup>a</sup>

| Frequency | $E_a$  | $\tau_0$             | Frequency | $E_a$  | $\tau_0$             |
|-----------|--------|----------------------|-----------|--------|----------------------|
| 115 Hz    | 6.23 K | $4.5 \times 10^{-7}$ | 370 Hz    | 7.57 K | $2.2 \times 10^{-7}$ |
| 184 Hz    | 6.53 K | $2.9 \times 10^{-7}$ | 1488 Hz   | 7.13 K | $8.0 \times 10^{-8}$ |

<sup>a</sup> The mean values of  $E_a$  and  $\tau_0$  are 6.9 K and  $2.6 \times 10^{-7}$ , respectively.

**Table S9.** Satisfied parameters obtained for the extended Debye model with ac susceptibility data from SQUID magnetometer of compound **2** in the zero applied field.

|   | $T(K)$  | $\chi_s$ | $\chi_T$ | $\tau (s)$ | $\alpha$ | Residual |
|---|---------|----------|----------|------------|----------|----------|
| 1 | 1.80011 | 0.14233  | 0.55004  | 0.0077     | 0.15769  | 0.001620 |
| 2 | 1.99968 | 0.12877  | 0.57722  | 0.00769    | 0.1433   | 0.001330 |
| 3 | 2.4998  | 0.1086   | 0.61386  | 0.00729    | 0.10782  | 0.000899 |
| 4 | 2.99958 | 0.09154  | 0.63013  | 0.00695    | 0.10358  | 0.000880 |
| 5 | 3.50001 | 0.08225  | 0.62543  | 0.00652    | 0.09416  | 0.000766 |
| 6 | 3.99996 | 0.07452  | 0.61307  | 0.0061     | 0.09341  | 0.000518 |
| 7 | 4.49998 | 0.06847  | 0.59302  | 0.00561    | 0.09106  | 0.000394 |
| 8 | 5.0005  | 0.06199  | 0.57471  | 0.0051     | 0.09651  | 0.000551 |



|    |          |         |         |          |         |          |
|----|----------|---------|---------|----------|---------|----------|
| 9  | 5.49996  | 0.05834 | 0.53644 | 0.00435  | 0.08082 | 0.007240 |
| 10 | 6.00052  | 0.05461 | 0.52729 | 0.00387  | 0.09266 | 0.000345 |
| 11 | 7.00011  | 0.04741 | 0.48681 | 0.00273  | 0.09776 | 0.000309 |
| 12 | 7.99984  | 0.04254 | 0.4478  | 0.00181  | 0.0977  | 0.000232 |
| 13 | 8.99979  | 0.03842 | 0.41367 | 0.00117  | 0.09911 | 0.000242 |
| 14 | 10.00038 | 0.03613 | 0.38445 | 7.46E-04 | 0.10516 | 0.000179 |
| 15 | 11.00001 | 0.03596 | 0.3581  | 4.72E-04 | 0.114   | 0.000206 |
| 16 | 11.50093 | 0.03946 | 0.34702 | 3.83E-04 | 0.11658 | 0.000148 |
| 17 | 11.9999  | 0.04678 | 0.33455 | 3.09E-04 | 0.1147  | 0.000276 |
| 18 | 12.49989 | 0.04983 | 0.32508 | 2.43E-04 | 0.12859 | 0.000236 |
| 19 | 12.99995 | 0.05397 | 0.31425 | 1.90E-04 | 0.13276 | 0.000325 |

**Table S10.** Satisfied parameters obtained for the extended Debye model with ac susceptibility data from SQUID magnetometer of compound **2** in the 2000 Oe applied field.

|    | $T(K)$   | $\chi_S$ | $\chi_T$ | $\tau (s)$ | $\alpha$ | Residual   |
|----|----------|----------|----------|------------|----------|------------|
| 1  | 1.80041  | 0.04893  | 0.699    | 0.04437    | 0.33054  | 0.00968    |
| 2  | 2.00016  | 0.04343  | 0.74949  | 0.04472    | 0.34767  | 0.00314    |
| 3  | 2.49988  | 0.03614  | 0.72079  | 0.02711    | 0.33993  | 0.00387    |
| 4  | 2.99994  | 0.03851  | 0.70702  | 0.02419    | 0.32807  | 0.00752    |
| 5  | 3.49994  | 0.03704  | 0.6767   | 0.0173     | 0.30279  | 0.00392    |
| 6  | 4.00007  | 0.03073  | 0.67313  | 0.01582    | 0.31831  | 0.00172    |
| 7  | 4.50005  | 0.03325  | 0.65253  | 0.01344    | 0.29521  | 0.00563    |
| 8  | 5.00005  | 0.03057  | 0.61662  | 0.00959    | 0.27213  | 0.00295    |
| 9  | 5.50017  | 0.03185  | 0.55346  | 0.00669    | 0.22958  | 0.00583    |
| 10 | 5.99997  | 0.02865  | 0.53767  | 0.00546    | 0.22557  | 0.00138    |
| 11 | 7.00004  | 0.02015  | 0.489    | 0.00341    | 0.2175   | 0.00174    |
| 12 | 8.00541  | 0.0316   | 0.45035  | 0.00191    | 0.13104  | 0.00274    |
| 13 | 9.00000  | 0.02147  | 0.40697  | 0.00114    | 0.14378  | 3.65702E-4 |
| 14 | 9.99997  | 0.02464  | 0.39146  | 7.4619E-4  | 0.14315  | 7.53572E-4 |
| 15 | 10.49998 | 0.0365   | 0.37052  | 5.96374E-4 | 0.0966   | 0.00111    |
| 16 | 11.00026 | 0.03264  | 0.35987  | 4.70226E-4 | 0.11769  | 0.00121    |
| 17 | 11.49997 | 0.03798  | 0.34925  | 3.807E-4   | 0.12784  | 3.70892E-4 |
| 18 | 11.99982 | 0.03921  | 0.3369   | 2.97893E-4 | 0.13334  | 3.04063E-4 |
| 19 | 12.49982 | 0.03196  | 0.32439  | 2.18515E-4 | 0.15862  | 2.20861E-4 |
| 20 | 12.99994 | 0.05613  | 0.31143  | 1.92221E-4 | 0.12048  | 6.46527E-4 |

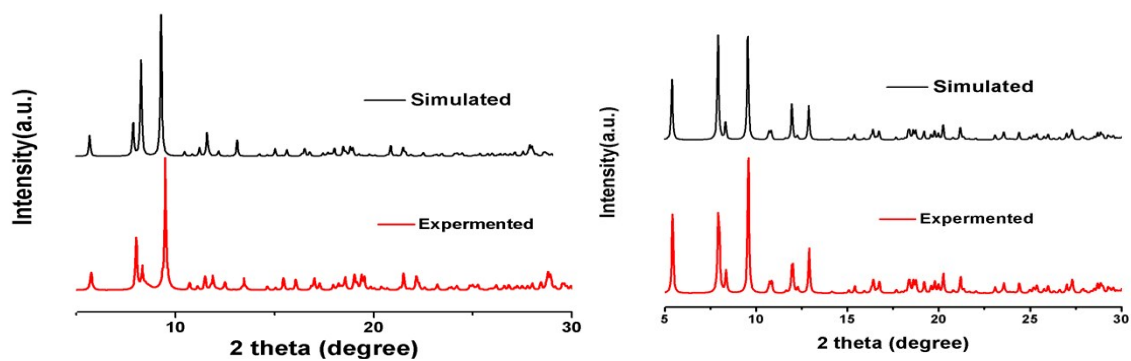

**Figure S1.** PXRD patterns and simulated patterns generated from single crystal diffraction data for compounds **1** (left) and **1'** (right).

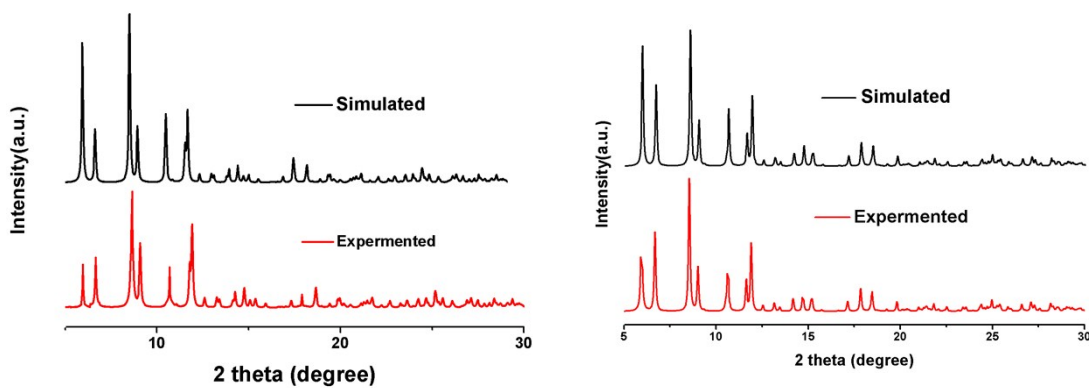

**Figure S2.** PXRD patterns and simulated patterns generated from single crystal diffraction data for compounds **2** (left) and **2'** (right).

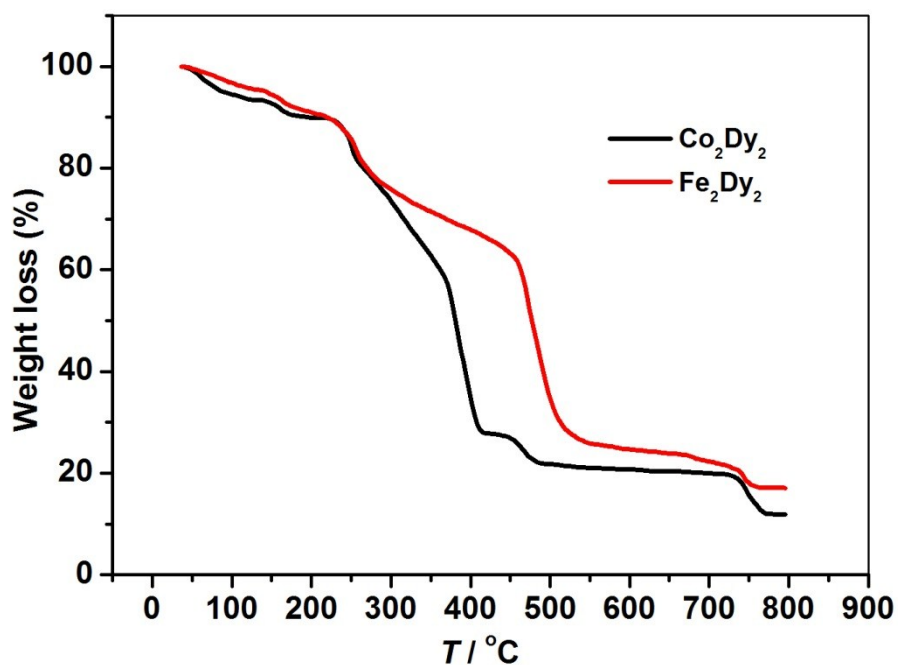

**Figure S3.** Plots of TGA for complexes **1** and **2**.

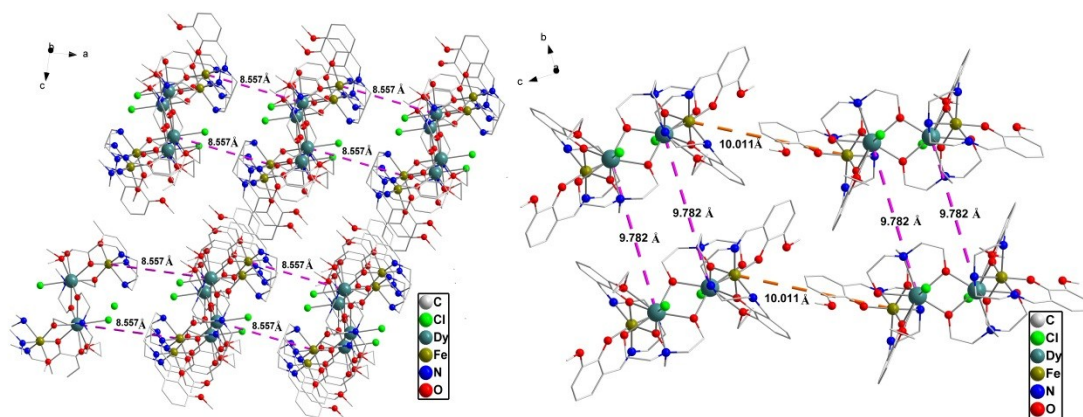

**Figure S4.** The plots show the shortest distances of Fe<sup>III</sup>...Dy<sup>III</sup> (left), Dy<sup>III</sup>...Dy<sup>III</sup> and Fe<sup>III</sup>...Fe<sup>III</sup> (right) between the nearest neighbor molecules of **1**. For clarity, the H atoms and solvent molecules were omitted.

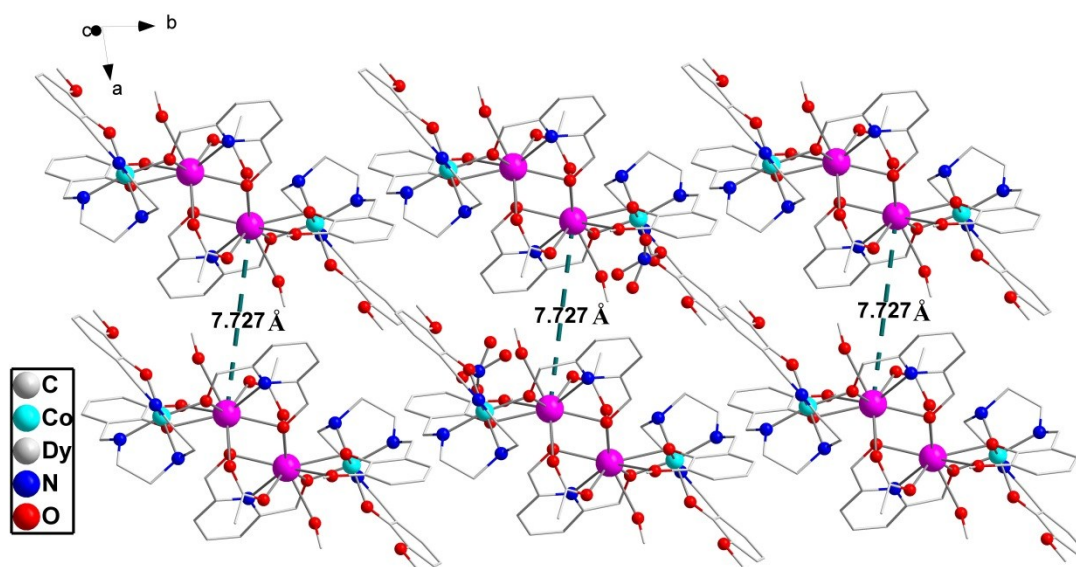

**Figure S5.** The plots show the shortest distances of Dy<sup>III</sup>...Dy<sup>III</sup> between the nearest neighbor molecules of **2**. For clarity, the H atoms and solvent molecules were omitted.

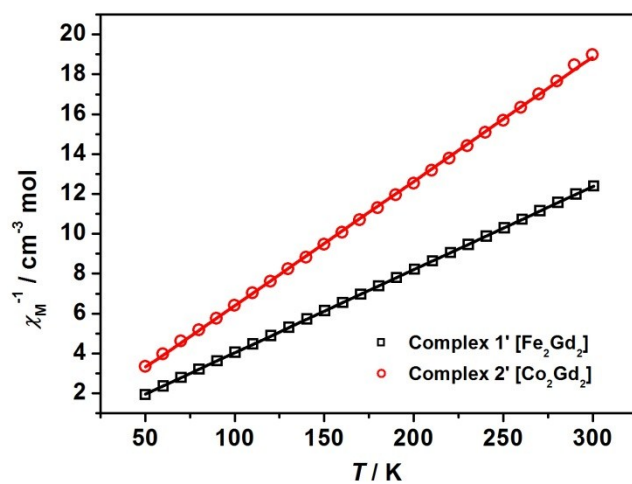

**Figure S6.** Plots of  $\chi_M^{-1}$  vs  $T$  for complexes **1'** and **2'**; the black and red solid lines represent the fitted results by the Curie-Weiss law.

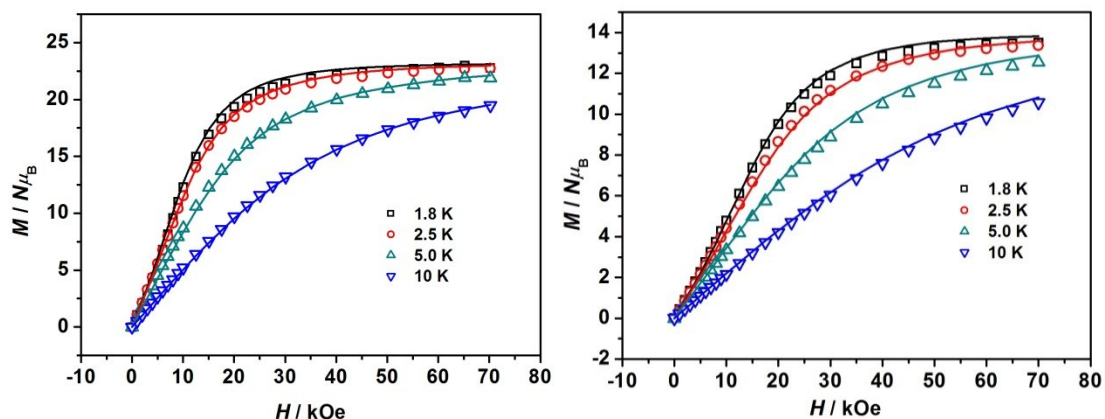

**Figure S7.**  $M$  vs  $H$  plots for complexes **1'** ( $[\text{Fe}_2\text{Gd}_2]$ , left) and **2'** ( $[\text{Co}_2\text{Gd}_2]$ , right); the solid lines represent the fitted results by PHI program.

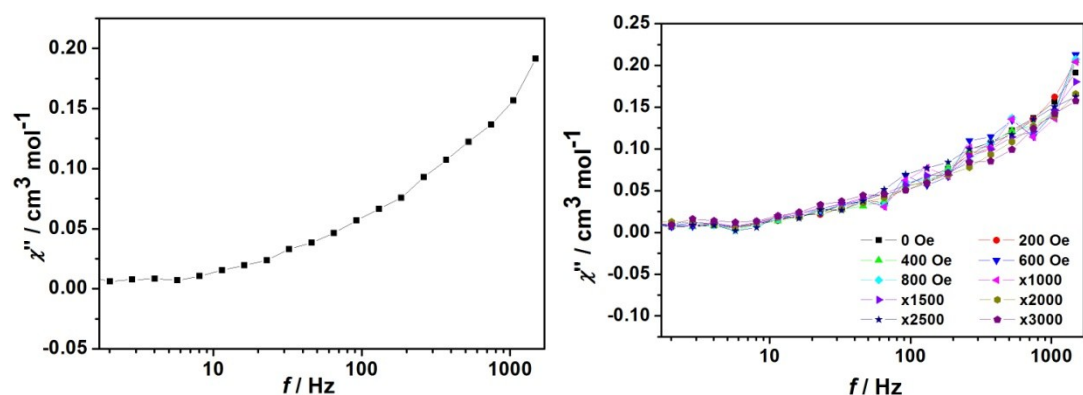

**Figure S8.** (Left) Plots of out-of-phase ( $\chi''$ ) versus  $f$  (left) for **1** at 2.0 K under zero dc field at various frequencies from 1 to 1488 Hz. **Notably**, the single curve clearly indicates that for complex **1**,  $\chi''$  signals were observed, but no peaks were found. Therefore, ac susceptibility measurements for **1** under zero dc fields at other temperatures were not performed. (Right) Out-of-phase ( $\chi''$ ) versus  $f$  for complex **1** at 2.0 K under the dc fields from 0 Oe to 3000 Oe and with the frequencies from 1 to 1488 Hz.

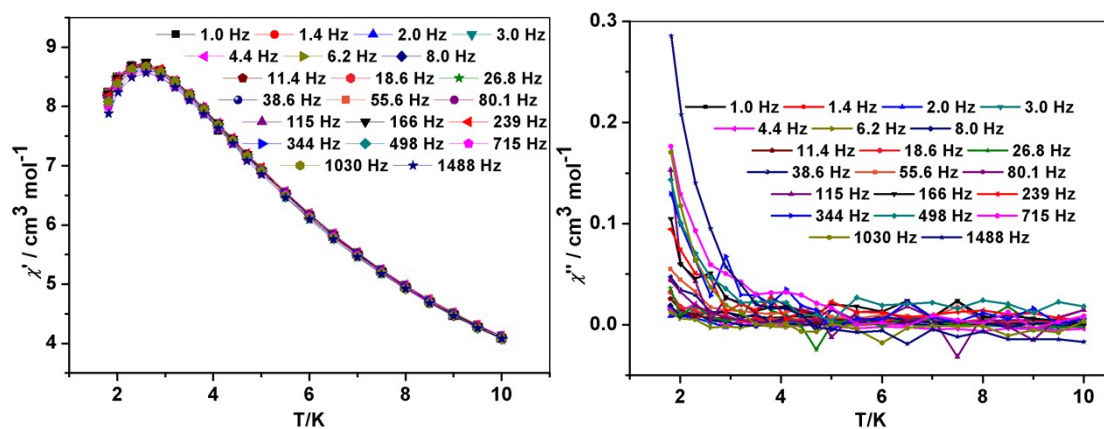

**Figure S9.** Plots of in-phase ( $\chi'$ ) versus  $T$  (left) and out-of-phase ( $\chi''$ ) versus  $T$  (right) for complex **1** at 1000 Oe dc field.

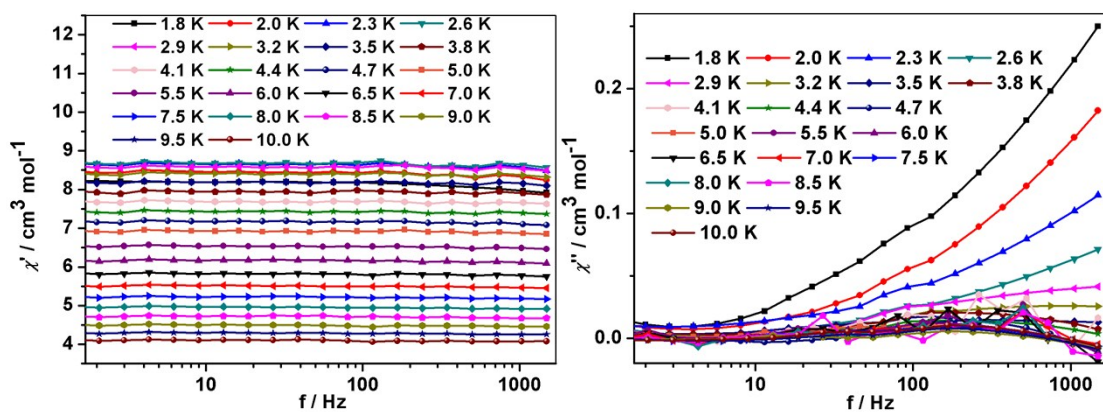

**Figure S10.** Plots of in-phase ( $\chi_M'$ ) versus  $f$  (left) and out-of-phase ( $\chi_M''$ ) versus  $f$  (right) for **1** at 1000 Oe dc field.

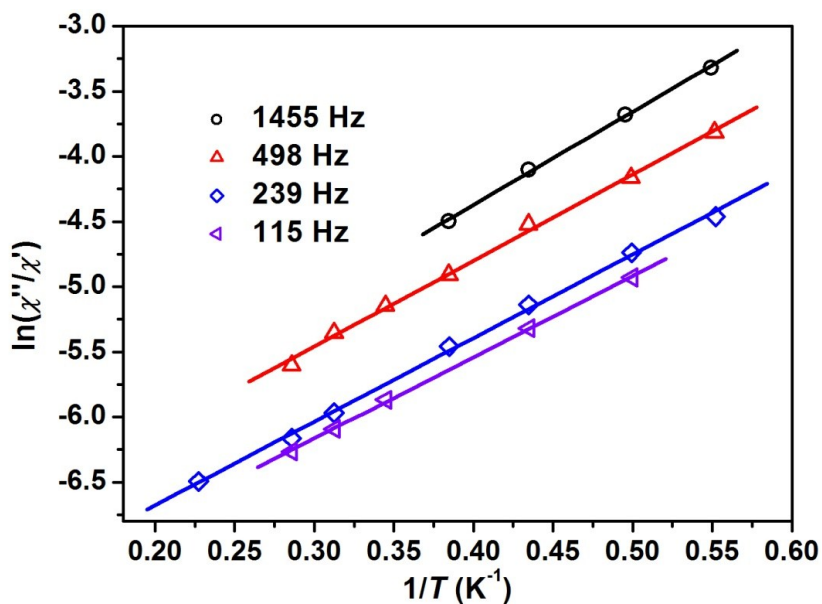

**Figure S11.** Plots of  $\ln(\chi_M''/\chi_M')$  versus  $1/T$  at different frequencies for complex **1**.

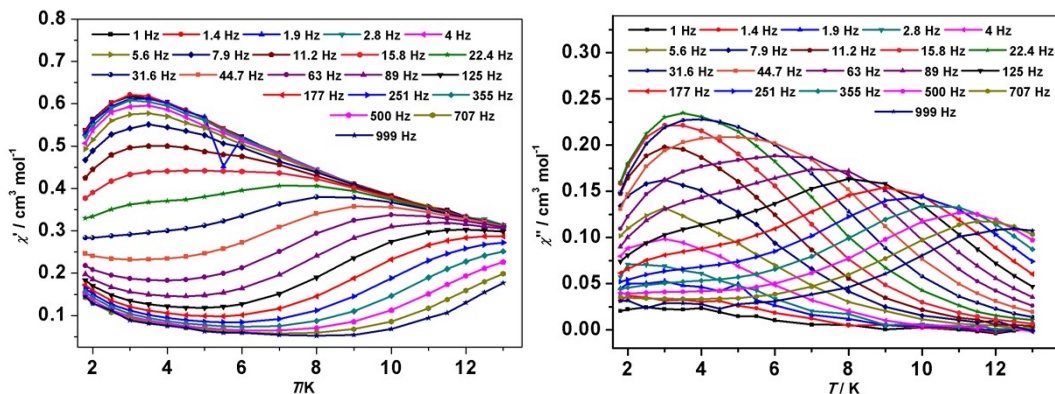

**Figure S12.** Plots of in-phase ( $\chi_M'$ ) versus  $T$  (left) and out-of-phase ( $\chi_M''$ ) versus  $T$  (right) for complex **2** at 0 Oe dc field.

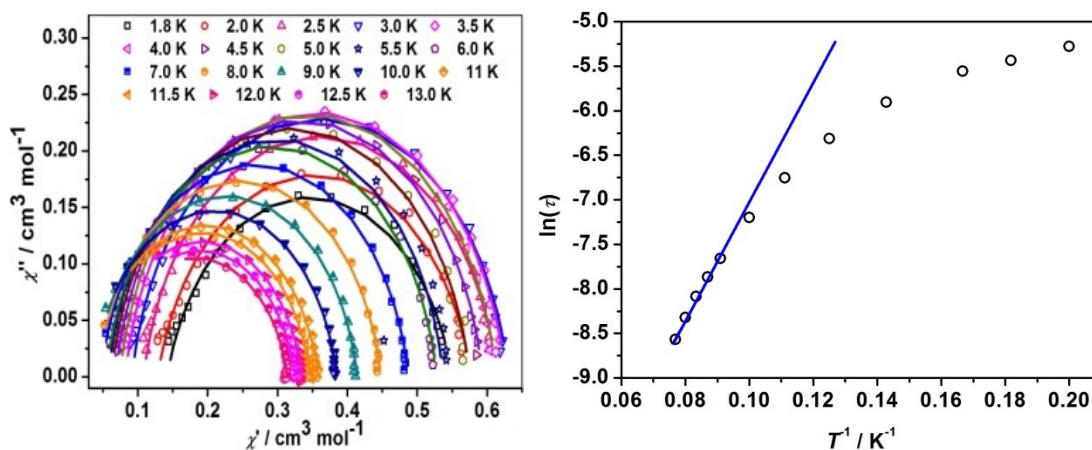

**Figure. S13** Cole-Cole plots for complex **2** under 0 Oe dc field (left). Solid lines show the fit of the data by employing the generalized single relaxation process Debye model. Arrhenius plots of  $\ln(\tau)$  vs  $T^{-1}$  under 0 Oe for complex **2** (right). The blue lines show the fit of the data to the Arrhenius law  $\tau = \tau_0 \exp(U_{\text{eff}}/kT)$ , assuming the Orbach relaxation process.

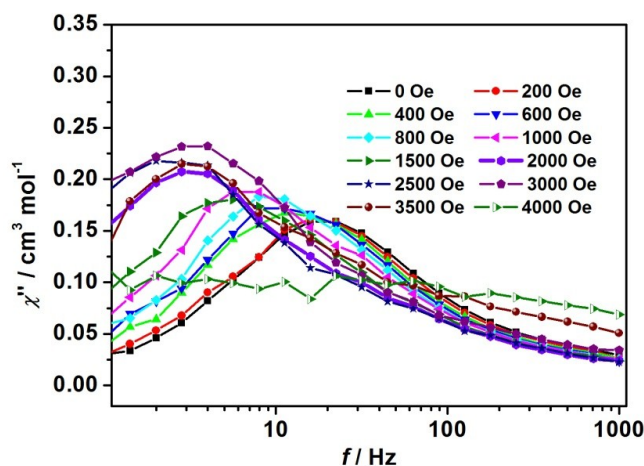

**Figure S14.** Plots of out-of-phase ( $\chi''_M$ ) versus  $f$  for complex **2** at 1.8 K under the dc fields from 0 Oe to 4000 Oe and with the frequencies from 1 to 999 Hz. To see easily, the optimal dc field employed by us were represented by thick violet line.

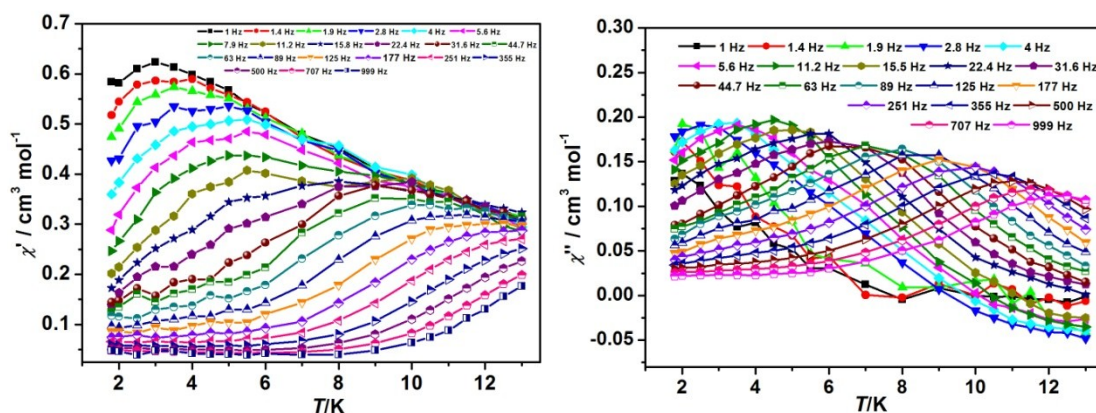

**Figure S15.** Plots of in-phase ( $\chi'_M$ , left) and out-of-phase ( $\chi''_M$ , right) versus  $T$  for complex **2** at 1.8-13 K under 2000 Oe dc field with the frequency ranging from 1 to 999 Hz.

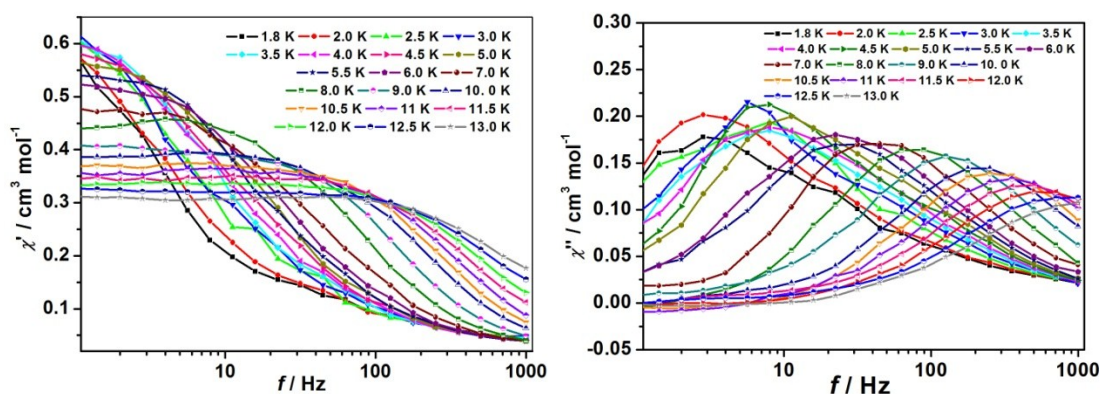

**Figure S16.** Plots of in-phase ( $\chi_M'$ , left) and out-of-phase ( $\chi_M''$ , right) versus  $f$  for complex **2** at 1.8–13 K under 2000 Oe dc field with the frequency ranging from 1 to 999 Hz.

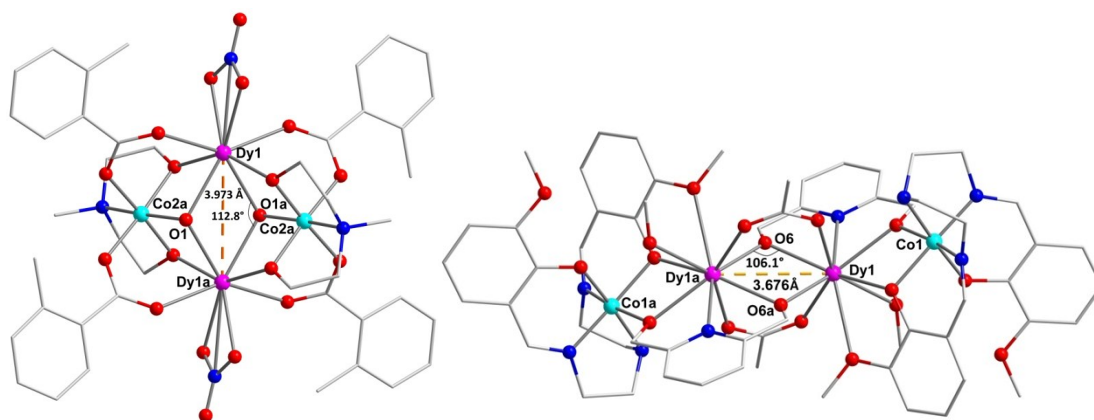

**Figure S17.** The plots showing the distances of Dy<sup>III</sup>...Dy<sup>III</sup> and angles of Dy1O1Dy1a (or Dy1O6Dy1a, bottom) for the complex reported by others (top) and the complex **2** reported in this work (bottom). Symmetry codes, a 1-x, 2-y, 2-z (top); a -x, 1-y, 1-z (bottom).

## Computational details

For **1**, two Dy<sup>III</sup> and Fe<sup>III</sup> fragments will be calculated. For compound **2**, only one type of Dy<sup>III</sup> fragment needs to be calculated due to its symmetry. Complete-active-space self-consistent field (CASSCF) calculations on individual Dy<sup>III</sup> or Fe<sup>III</sup> fragments indicated as **1\_Dy**, **1\_Fe** and **2\_Dy** (see Figure S18 for the calculated structures of complexes **1** and **2**) on the basis of single-crystal X-ray determined geometry have been carried out with MOLCAS 8.2 program package. Each individual Dy<sup>III</sup> or Fe<sup>III</sup> fragment in **1** and **2** was calculated keeping the experimentally determined structure of the corresponding compound while the neighboring Dy<sup>III</sup>, Co<sup>III</sup> (or Fe<sup>III</sup>) ions were replaced by diamagnetic Lu<sup>III</sup> and Sc<sup>III</sup>, respectively.

The basis sets for all atoms are atomic natural orbitals from the MOLCAS ANO-RCC library: ANO-RCC-VTZP for Dy<sup>III</sup> or Fe<sup>III</sup>; VTZ for close N and O; VDZ for distant atoms. The calculations employed the second order Douglas-Kroll-Hess Hamiltonian, where scalar relativistic contractions were taken into account in the basis set and the spin-orbit couplings were handled separately in the restricted active space state interaction (RASSI-SO) procedure. For individual Dy<sup>III</sup> fragment, active electrons in 7 active spaces include all *f* electrons (CAS(9 in 7)), active electrons in 5 active spaces include all *d* electrons (CAS(5 in 5)) for Fe<sup>III</sup> fragment in the CASSCF calculation. To exclude all the doubts, we calculated all the roots in the active space. We have mixed the maximum number of spin-free state which was possible with our hardware (all from 21 sextets, 128 from 224 quadruplets, 130 from 490 doublets). SINGLE\_ANISO program was used to obtain the energy levels, *g* tensors, *m<sub>J</sub>* values, magnetic axes, *et al.*, based on the above CASSCF/RASSI-SO calculations.

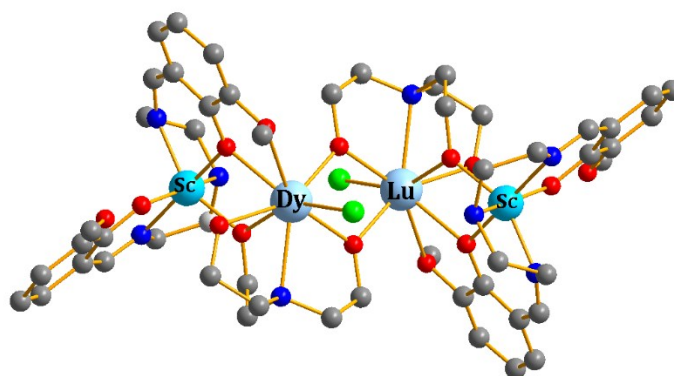

1\_Dy

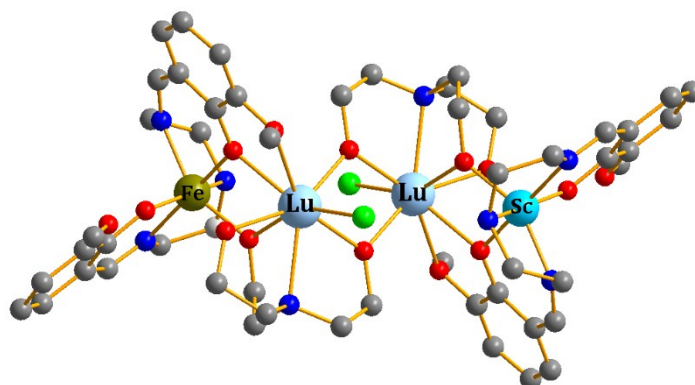



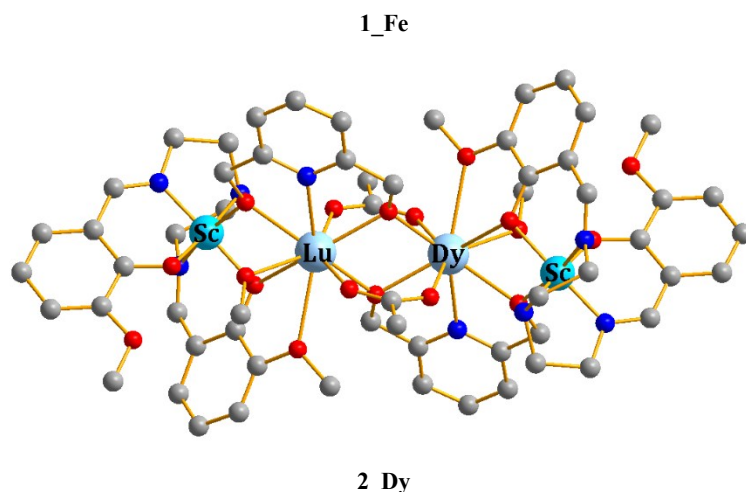

**Figure S18.** Calculated model structures of **1\_Dy**, **1\_Fe** and **2\_Dy**; H atoms are omitted.

**Table S11.** Calculated energy levels ( $\text{cm}^{-1}$ ),  $\mathbf{g}$  ( $g_x, g_y, g_z$ ) tensors and predominant  $m_J$  values of the lowest eight Kramers doublets (KDs) of **1\_Dy** and **2\_Dy**, and zero-field splitting parameters  $D(E)$  ( $\text{cm}^{-1}$ ),  $\mathbf{g}$  ( $g_x, g_y, g_z$ ) tensor of the lowest spin-orbit state of **2\_Fe** using CASSCF/RASSI-SO with MOLCAS 8.2.

| KDs | 1_Dy               |                          |            | 1_Fe        |                         | 2_Dy               |                          |            |
|-----|--------------------|--------------------------|------------|-------------|-------------------------|--------------------|--------------------------|------------|
|     | $E/\text{cm}^{-1}$ | $\mathbf{g}$             | $m_J$      | $D(E)$      | $\mathbf{g}$            | $E/\text{cm}^{-1}$ | $\mathbf{g}$             | $m_J$      |
| 1   | 0.0                | 0.286<br>0.511<br>19.086 | $\pm 15/2$ | 0.12(-0.03) | 2.002<br>2.002<br>2.002 | 0.0                | 0.012<br>0.020<br>19.742 | $\pm 15/2$ |
| 2   | 28.4               | 0.332<br>1.129<br>17.871 | $\pm 3/2$  |             |                         | 146.4              | 0.109<br>0.181<br>17.874 | $\pm 13/2$ |
| 3   | 68.5               | 0.209<br>1.377<br>16.294 | $\pm 11/2$ |             |                         | 227.4              | 0.724<br>1.498<br>13.719 | $\pm 11/2$ |
| 4   | 142.8              | 0.975<br>1.532<br>15.695 | $\pm 13/2$ |             |                         | 267.1              | 1.812<br>4.832<br>14.089 | $\pm 1/2$  |
| 5   | 157.6              | 0.422<br>3.482<br>11.016 | $\pm 7/2$  |             |                         | 318.4              | 8.959<br>6.823<br>0.218  | $\pm 5/2$  |

|   |       |                          |           |  |       |                          |           |
|---|-------|--------------------------|-----------|--|-------|--------------------------|-----------|
| 6 | 222.0 | 4.339<br>5.436<br>8.347  | $\pm 5/2$ |  | 353.8 | 2.457<br>4.652<br>14.017 | $\pm 3/2$ |
| 7 | 317.1 | 1.567<br>2.210<br>12.089 | $\pm 1/2$ |  | 466.3 | 0.459<br>1.721<br>13.770 | $\pm 7/2$ |
| 8 | 356.3 | 0.824<br>4.657<br>15.318 | $\pm 9/2$ |  | 499.4 | 0.281<br>2.229<br>15.517 | $\pm 9/2$ |

**Table S12.** Wave functions with definite projection of the total moment  $|m_J\rangle$  for the lowest two KDs of individual Dy<sup>III</sup> fragments for **1\_Dy** and **2\_Dy** using CASSCF/RASSI-SO with MOLCAS 8.2.

|             | $E/\text{cm}^{-1}$ | wave functions                                                                                                                   |
|-------------|--------------------|----------------------------------------------------------------------------------------------------------------------------------|
| <b>1_Dy</b> | 0.0                | 91.54% $ \pm 15/2\rangle$                                                                                                        |
|             | 28.4               | 19.49% $ \pm 7/2\rangle$ +26.75% $ \pm 5/2\rangle$ +18.79% $ \pm 3/2\rangle$ +15.47% $ \pm 1/2\rangle$ +7.43% $ \pm 11/2\rangle$ |
| <b>2_Dy</b> | 0.0                | 98.67% $ \pm 15/2\rangle$                                                                                                        |
|             | 146.4              | 62.63% $ \pm 13/2\rangle$ +21.48% $ \pm 11/2\rangle$ +8.93% $ \pm 9/2\rangle$                                                    |

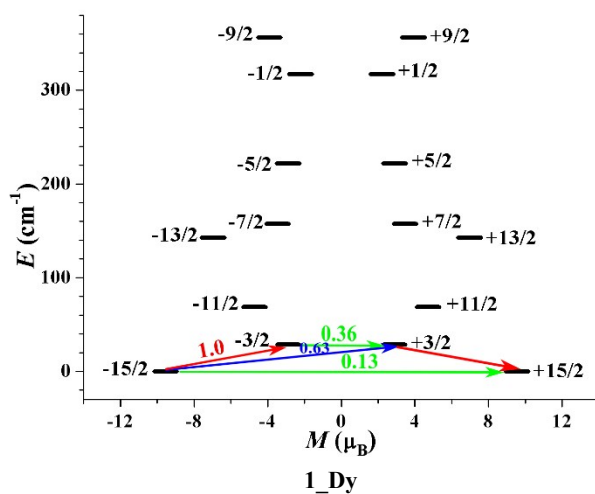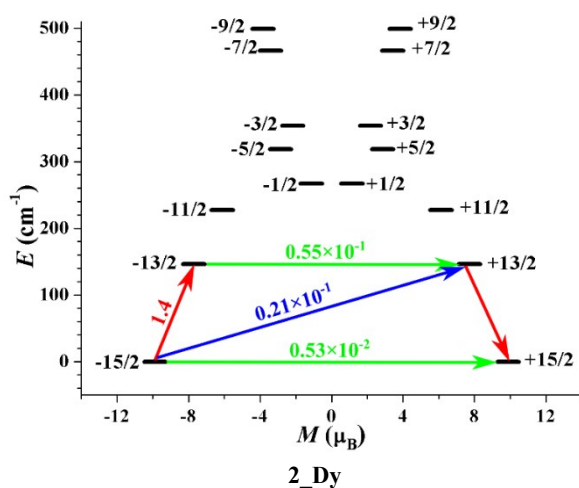

**Figure S19.** Magnetization blocking barriers for individual Dy<sup>III</sup> fragments of **1\_Dy** and **2\_Dy**. The thick black lines represent the KDs of the individual Dy<sup>III</sup> fragments as a function of their magnetic moment along the magnetic axis. The green lines correspond to diagonal matrix element of the transversal magnetic moment; the blue line represent Orbach relaxation processes. The path shown by the red arrows represents the most probable path for magnetic relaxation in the corresponding compounds. The numbers at each arrow stand for the mean absolute value of the corresponding matrix element of transition magnetic moment.

To fit the exchange interactions in complexes **1** and **2**, we took two steps to obtain them. Firstly, we calculated individual Dy<sup>III</sup> or Fe<sup>III</sup> fragments using CASSCF/RASSI-SO to obtain the corresponding magnetic properties. Then, the exchange interaction between the magnetic centers is considered within the Lines model, while the account of the dipole-dipole magnetic coupling is treated exactly. The Lines model is effective and has been successfully used widely in the research field of *d* and *f*-elements single-molecule magnets.

For compounds **1** and **2**, there are two and one types of  $\mathcal{J}$ , respectively.

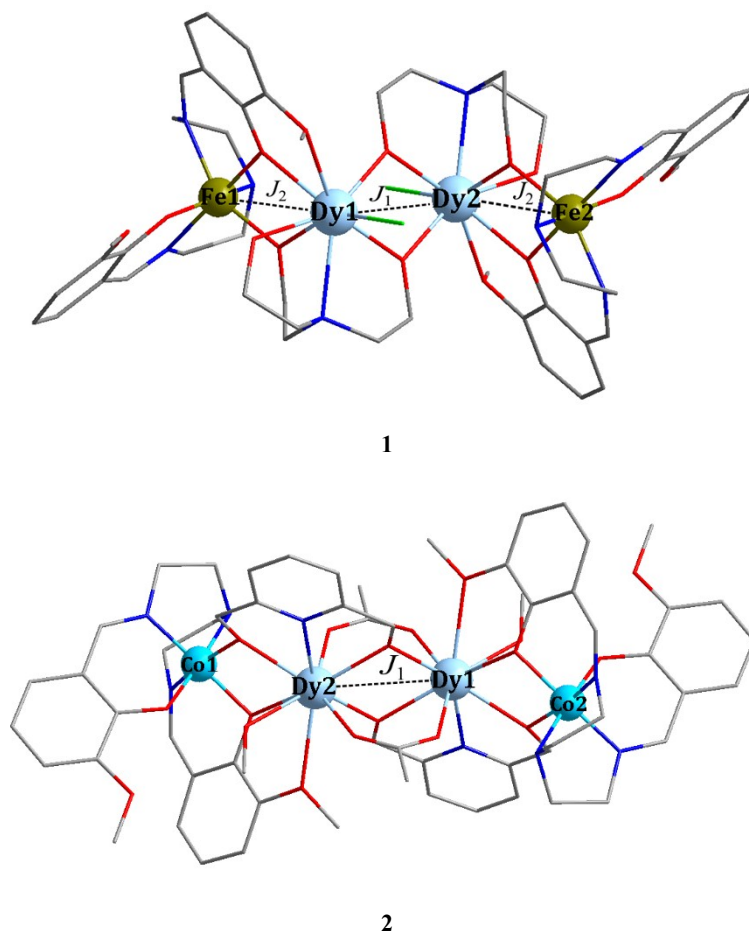

**Figure S20.** Two types of  $J_1$  and  $J_2$  in **1** and one type of  $J_1$  in **2**.

The Ising exchange Hamiltonians for **1** and **2** are:

$$H_{exch} = -J_1 S_{Dy1}^z S_{Dy2}^z - J_2 S_{Dy1}^z S_{Fe1}^z - J_2 S_{Dy2}^z S_{Fe2}^z \text{ for } \mathbf{1} \quad (1)$$

$$H_{exch} = -J_1 S_{Dy1}^z S_{Dy2}^z \text{ for } \mathbf{2} \quad (2)$$

The  $J_1$  and  $J_2$  are the effective exchange coupling constants between Dy1-Dy2 and Dy1-Fe1 (Dy2-Fe2), respectively. The  $S_{Dy} = 1/2$  is the ground pseudospin on the Dy<sup>III</sup> sites and the  $S_{Fe} = 5/2$  is the ground spin on the Fe<sup>III</sup> ions. The dipolar magnetic coupling can be calculated exactly, while the exchange coupling constants were fitted through comparison of the computed and measured magnetic susceptibility using the POLY\_ANISO program.

**Table S13.** Exchange energies  $E$  (cm<sup>-1</sup>), the energy difference between each exchange doublets  $\Delta_t$  (cm<sup>-1</sup>) and the main values of the  $g_z$  for the lowest eight and two exchange doublets of **1** and **2**.

|   | <b>1</b> |                      |        | <b>2</b> |                      |        |
|---|----------|----------------------|--------|----------|----------------------|--------|
|   | $E$      | $\Delta_t$           | $g_z$  | $E$      | $\Delta_t$           | $g_z$  |
| 1 | 0.0      | $3.6 \times 10^{-4}$ | 0.000  | 0.0      | $3.6 \times 10^{-6}$ | 0.000  |
| 2 | 1.1      | $3.5 \times 10^{-4}$ | 51.007 | 2.5      | $2.6 \times 10^{-6}$ | 39.481 |
| 3 | 4.1      | $9.4 \times 10^{-4}$ | 0.000  |          |                      |        |
| 4 | 4.1      | $7.2 \times 10^{-4}$ | 0.000  |          |                      |        |
| 5 | 5.1      | $1.4 \times 10^{-3}$ | 38.148 |          |                      |        |
| 6 | 5.1      | $3.0 \times 10^{-3}$ | 38.152 |          |                      |        |
| 7 | 8.3      | $1.7 \times 10^{-3}$ | 0.000  |          |                      |        |
| 8 | 9.2      | $1.7 \times 10^{-3}$ | 30.760 |          |                      |        |

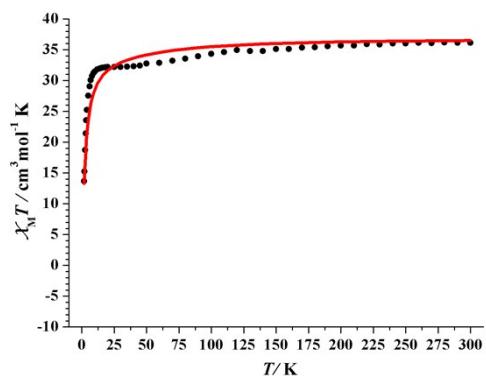

1

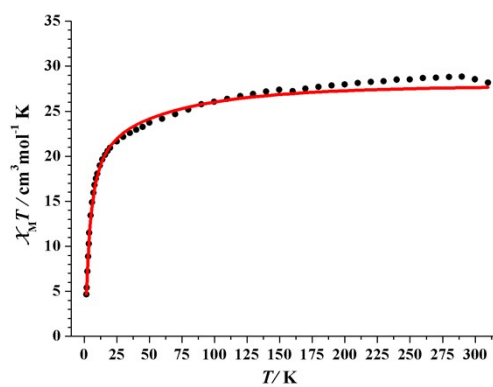

2

**Figure S21.** Calculated (red solid line) and experimental (black dot) data of magnetic susceptibilities of **1** and **2**. The intermolecular interactions  $zJ'$  of **1** and **2** were fitted to  $-0.10$  and  $-0.09$   $\text{cm}^{-1}$ , respectively.

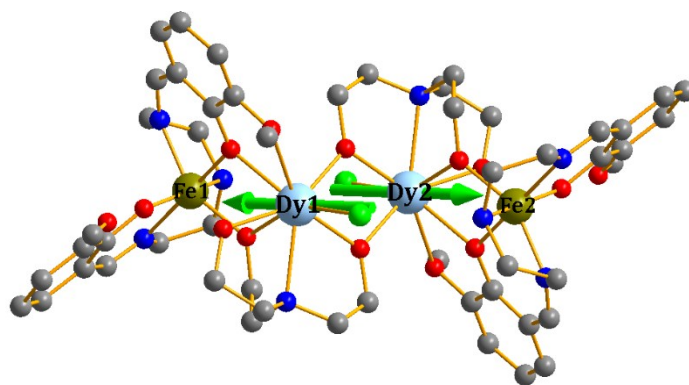

1

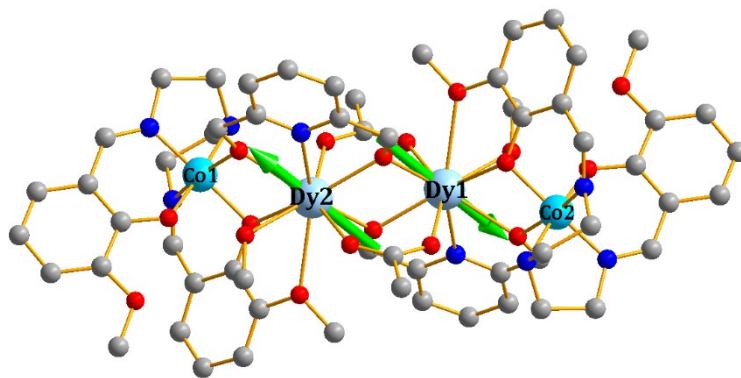

2

**Figure S22.** Calculated orientations of the local main magnetic axes in the ground KDs on Dy<sup>III</sup> ions of complexes **1** and **2**.

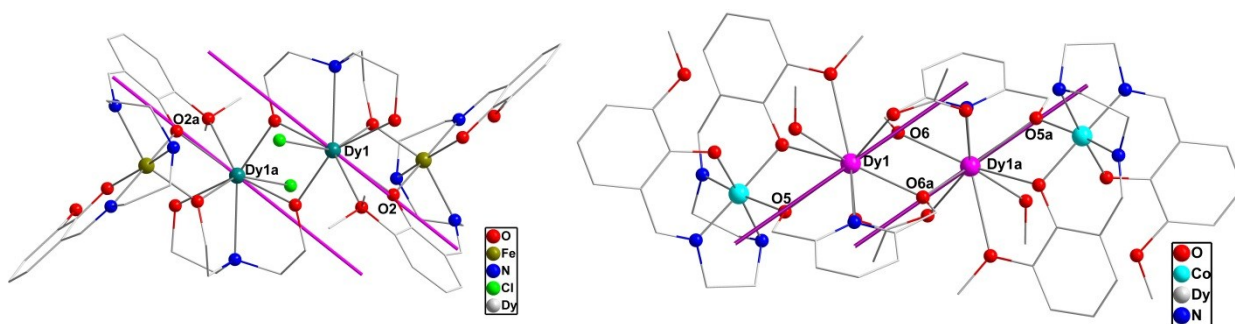

**Figure S23.** Ground-state magnetic anisotropy of **1** (left) and **2** (right) calculated by Magellan Software. The thick line represents the orientation of the anisotropy axis for two Dy<sup>III</sup> ions in both complexes.
